# Supplementary material for: A Mg-doped manganese-based layered double oxide catalyst realizes the highly selective oxidation of toluene derivatives to aldehydes
Source: Royal Society of Chemistry journal article supplement (doi:10.1039/d5nj03850b), 2025-11-29
Supplement: d5nj03850b1.pdf [file d5nj03850b1.pdf]

## Supporting Information

Mg-doped manganese-based layered double oxide catalyst realizes the highly selective oxidation of toluene derivatives to aldehydes

*Deqin Liang<sup>a</sup>, Yu Wang<sup>a</sup>, Xiaojing Yin<sup>a</sup>, Ziyang Liu<sup>a</sup>, Jizhou Du<sup>b</sup>, Junfeng Qian<sup>a</sup>,  
Mingyang He<sup>a,\*</sup>, Weiyu Zhou<sup>a,\*</sup>*

<sup>a</sup> Jiangsu Key Laboratory of Advanced Catalytic Materials and Technology, Changzhou University,  
Changzhou 213164, China

<sup>b</sup> Intellectual Property Management Office, PetroChina Co., Ltd., Beijing 100101, China

### Benzyl alcohol oxidizes to benzaldehyde

Typically, a mixture of 1.0 mmol benzyl alcohol, 2 mL HFIP, 25mg NHPI and 75 mg MnMgAl-LDO were magnetically stirred at 40 °C under 1 atm of O<sub>2</sub> atmosphere. The reaction was analyzed through a GC-MS (SHIMADZU, GCMS-QP2010 SE). The conversion rate of benzyl alcohol was 12% after 12 h reaction.

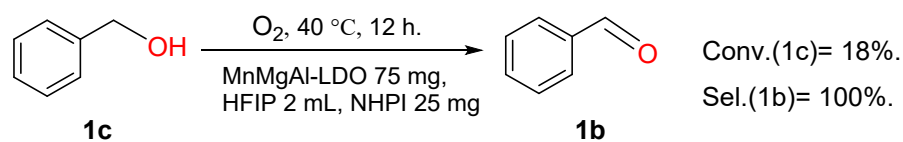

**Scheme S1** Oxidation of benzyl alcohol to benzaldehyde under the standard reaction conditions.

## Characterization of the catalyst

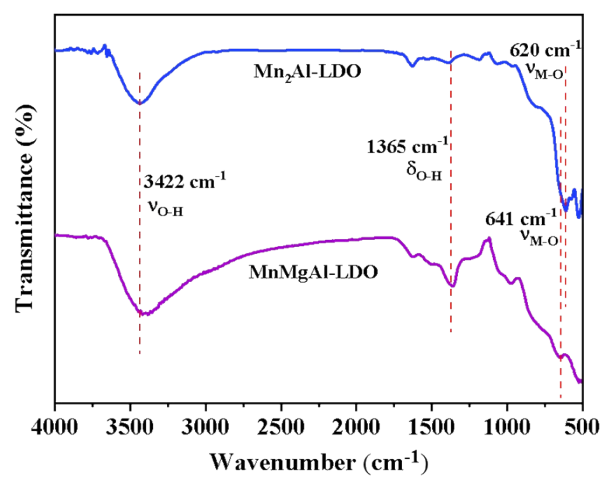

**Fig. S1.** FT-IR spectra of the  $\text{MnMgAl-LDO}$  and  $\text{Mn}_2\text{Al-LDO}$ .

## Characterization of the recycled catalyst

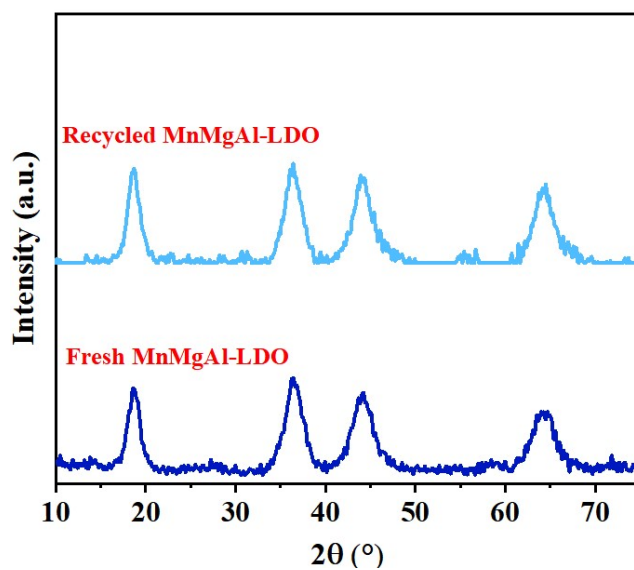

Fig. S2. XRD of the recycled MnMgAl-LDO.

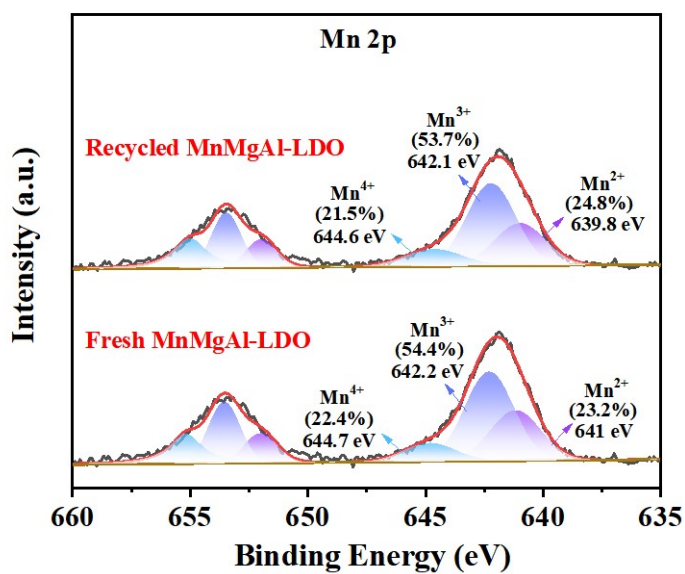

Fig. S3. XPS spectra of Mn 2p of recycled MnMgAl-LDO.

Table S1. ICP of the recycled MnMgAl-LDO.

| Samples              | Content (wt%) |       |       | Mn:Mg:Al    |
|----------------------|---------------|-------|-------|-------------|
|                      | Mn            | Mg    | Al    |             |
| MnMgAl-LDO(Fresh)    | 25.80         | 13.80 | 12.40 | 1.02:1.25:1 |
| MnMgAl-LDO(Recycled) | 25.04         | 13.12 | 11.82 | 1.04:1.25:1 |

**Table S2.** Some typical catalytic systems based on NHPI are used for aerobic oxidation of toluene.

| Entry | Catalyst                          | Reaction conditions                      | Conv. /% | Sel. /% | Ref.      |
|-------|-----------------------------------|------------------------------------------|----------|---------|-----------|
| 1     | Co(OAc) <sub>2</sub>              | NHPI, CH <sub>3</sub> CN, O <sub>2</sub> | 84.0     | 4.0     | [1]       |
| 2     | porphyrin-biscopper<br>hexaphyrin | NHPI, CH <sub>3</sub> CN, O <sub>2</sub> | 21.5     | 59.3    | [2]       |
| 3     | CoOx/SiO <sub>2</sub>             | NHPI, HFIP, O <sub>2</sub>               | 91.0     | 68.2    | [3]       |
| 5     | CoMnAl-LDO                        | NHPI, HFIP, O <sub>2</sub>               | 55.7     | 58      | [4]       |
| 6     | MnMgAl-LDO                        | NHPI, HFIP, O <sub>2</sub>               | 77.0     | 86.0    | This work |
| 7     | MnMgAl-LDO                        | NHPI, HFIP, Air                          | 71.2     | 81.3    | This work |

## References

- [1] Ishii Y, Sakaguchi S, Iwahama T. Innovation of hydrocarbon oxidation with molecular oxygen and related reactions. *Advanced Synthesis & Catalysis*, 2001, 343(5): 393–427.
- [2] Chen H, Wang L, Xu S, et al. Selective functionalization of hydrocarbons using a ppm bioinspired molecular tweezer via proton-coupled electron transfer. *ACS Catalysis*, 2021, 11(12): 6810–6815.
- [3] Shi G, Xu S, Bao Y, et al. Selective aerobic oxidation of toluene to benzaldehyde on immobilized  $\text{CoO}_x$  on  $\text{SiO}_2$  catalyst in the presence of *N*-hydroxyphthalimide and hexafluoropropan-2-ol. *Catalysis Communications*, 2019, 123, 73–78.
- [4] Zhang T, Wang G, Xu X, et al. Application of Co-Mn-Al sheet-like metal oxide catalysts in the liquid phase conversion of toluene to benzaldehyde. *Applied Catalysis A: General*, 2023, 663: 119314.
